# Supplementary material
Source: PubMed Central journal article supplement (PMC6256029)
Supplement: zjb999094924s1.pdf [file zjb999094924s1.pdf]

| Target                                      | Primer name       | Primer Sequence (5'→3')                                      |
|---------------------------------------------|-------------------|--------------------------------------------------------------|
| <b>Cloning Primers</b>                      |                   |                                                              |
| <i>cre</i>                                  |                   |                                                              |
|                                             | CRE@pUC18A-F      | GGTCTGACGCTCAGTGGAACGGCAGAGGCCTGCGGATCC                      |
|                                             | CRE@pUC18-R       | CTGGCGTTACCCAACCTTAATCGCCGGAGGACACCATGTCCAATTTACTGACCGTACACC |
|                                             | CRE-aadA@pSUMC-F  | CTGCAGGTACCGGTGACCATTCGCAAGCTTATCATCATGCCTCC                 |
|                                             | CRE-aadA@pSUMC-R  | GATCTTTCTACGGGGTCTGACGCTCGCAGAGGCCTGCGGATCC                  |
|                                             | CRE+Pbla-F        | AGGGTTATTGTCTCATGAGCGGATACATATTTGAAGTCACGACGTTGTAACGACGGC    |
|                                             | CRE+Pbla-R        | GATAAATGCTTCAATAATATTGAAAAGGAAGAGTATGTCCAATTTACTGACCGTACACC  |
|                                             |                   |                                                              |
| <i>tmeA</i>                                 |                   |                                                              |
|                                             | loxP-blagfp-F     | CTACTTCGTATAGCATAACATTATACGAAGTTATGGAAATGTGCGCGGAACCC        |
|                                             | LoxP-blagfp-R     | ATAACTTCGTATAATGTATGCTATACGAAGTTATTTACTTGTATAGTTCATCCATGCCAT |
|                                             | HomRR@pSUMC-F     | CTGCAGGTACCGGTGACCATTCGGTCTGACGCTCAGTGGAACG                  |
|                                             | HomRR@pSUMC-R     | GATCTTTCTACGGGGTCTGACGCTCCTGGCGTTACCCAACCTTAATCGCC           |
| <b>Screening Primers for <i>gfp-bla</i></b> |                   |                                                              |
| ploxP-GFP<br>-bla                           |                   |                                                              |
|                                             | Screen-S          | CTTAGCCGTGAAAGTACACAACCTATTG                                 |
|                                             | Screen-AS         | GAGAAGCGACATCTTTACGTTTCGCC                                   |
| <i>tmeA</i> locus                           |                   |                                                              |
|                                             | Surroundctl0063-F | TAGTAGCTCTTGCAGGGTGTACTT                                     |
|                                             | Surroundctl0063-R | TACTACTTCCTCTTAATAGTTGAAAGGACCG                              |
| <b>qPCR Primers</b>                         |                   |                                                              |
| <i>16s</i>                                  | Fwd               | CCTGGTAGTCCTTGCCGTAAC                                        |
|                                             | Rev               | TACTCCTCAGGCGGCATACTTA                                       |
| <i>tmeA</i>                                 | Fwd               | TAACCTATCTGTGGGAGGGAAG                                       |
|                                             | Rev               | GGCATCTACCGTAGGATCTGTA                                       |
|                                             |                   |                                                              |

|              |     |                              |
|--------------|-----|------------------------------|
| <i>tmeB</i>  | Fwd | TTCGGAGCTCATAGGAGAACT        |
|              | Rev | GCTCATTACAGGAGGGAATAC        |
| <i>gfp</i>   | Fwd | GTGCCATGCCCGAAGGTTAT         |
|              | Rev | CTTCAGCACGTGTCTTGTAGTTCC     |
| <i>cre</i>   | Fwd | TGCAAGTTGAATAACCGGAAATG      |
|              | Rev | GGGCCTGAAGATATAGAAGATAATCG   |
| <i>rpoD</i>  | Fwd | GCGGTGTTCCATTGTCGTCATA       |
|              | Rev | ATTTCTCTCAGCTCGCGCTTTC       |
| <i>Ct696</i> | Fwd | TCGTAGAGGTTCTGCTAGCCTTT      |
|              | Rev | TCGGTAATCACGCCTCCGATAA       |
| pL2          | Fwd | GACAACGCTTCAAAGAAGATGGCTCTA  |
|              | Rev | CCTCTAGTACAAACACCCCAATATTGTG |

**Supplementary Table 1. Custom Primers**
